# Supplementary material for: Comparison of Model Predictions and Laboratory Observations of Transgene Frequencies in Continuously-Breeding Mosquito Populations
Source: Insects. 2016 Sep 22;7(4):47. doi: 10.3390/insects7040047 (PMC5198195; doi:10.3390/insects7040047)
Supplement: Supplementary file 1 [file insects-07-00047-s001.xlsx]

## Sheet: Individual egg data
X Date	Female	FemTransgenic?	FemSpecis	Generation	Male	MaleTransgenic?	Generation	Bloodfeed	Egg collection	Egg collection method	TotalEggs	Hatched	Unhatched
2010-07-20	Ag(DSM)1	yes	gambiae	0	G3	no	1	First	First	individual	166	163	3
2010-07-20	Ag(DSM)2	yes	gambiae	0	G3	no	1	First	First	individual	115	89	26
2010-07-20	Ag(DSM)2	yes	gambiae	0	G3	no	1	First	First	individual	80	68	12
2010-07-20	Ag(DSM)2	yes	gambiae	0	G3	no	1	First	First	individual	54	48	6
2010-07-20	Ag(DSM)2	yes	gambiae	0	G3	no	1	First	First	individual	136	123	13
2010-08-03	G3	no	gambiae	BC1	Ag(DSM)2	no	not known	First	First	individual	140	135	5
2010-08-03	G3	no	gambiae	BC1	Ag(DSM)2	yes	not known	First	First	individual	82	0	82
2010-08-03	G3	no	gambiae	BC1	Ag(DSM)2	no	not known	First	First	individual	118	102	16
2010-08-03	G3	no	gambiae	BC1	Ag(DSM)2	no	not known	First	First	individual	114	104	10
2010-08-03	G3	no	gambiae	BC1	Ag(DSM)2	no	not known	First	First	individual	107	101	6
2010-08-03	G3	no	gambiae	BC1	Ag(DSM)2	no	not known	First	First	individual	132	120	12
2010-08-03	G3	no	gambiae	BC1	Ag(DSM)2	no	not known	First	First	individual	116	112	4
2010-08-03	G3	no	gambiae	BC1	Ag(DSM)1	no	not known	First	First	individual	122	108	14
2010-08-03	G3	no	gambiae	BC1	Ag(DSM)1	no	not known	First	First	individual	124	115	9
2010-08-03	G3	no	gambiae	BC1	Ag(DSM)1	no	not known	First	First	individual	127	100	27
2010-08-03	G3	no	gambiae	BC1	Ag(DSM)1	yes	not known	First	First	individual	94	0	94
2010-08-03	G3	no	gambiae	BC1	Ag(DSM)1	no	not known	First	First	individual	97	95	2
2010-08-03	G3	no	gambiae	BC1	Ag(DSM)1	no	not known	First	First	individual	100	95	5
2010-08-03	G3	no	gambiae	BC1	Ag(DSM)1	no	not known	First	First	individual	85	77	8
2010-08-03	G3	no	gambiae	BC1	Ag(DSM)1	no	not known	First	First	individual	99	91	8
2010-08-03	G3	no	gambiae	BC1	Ag(DSM)1	yes	not known	First	First	individual	153	0	153
2010-08-03	G3	no	gambiae	BC1	Ag(DSM)1	no	not known	First	First	individual	118	113	5
2010-08-03	G3	no	gambiae	BC1	Ag(DSM)1	no	not known	First	First	individual	113	109	4
2010-08-03	G3	no	gambiae	BC1	Ag(DSM)1	no	not known	First	First	individual	64	59	5
2010-08-03	Ag(DSM)2	yes	gambiae	BC2	G3	no	not known	First	First	individual	139	137	2
2010-08-03	Ag(DSM)2	yes	gambiae	BC2	G3	no	not known	First	First	individual	128	122	6
2010-08-03	Ag(DSM)2	yes	gambiae	BC2	G3	no	not known	First	First	individual	134	128	6
2010-08-03	Ag(DSM)1	yes	gambiae	BC2	G3	no	not known	First	First	individual	153	153	0
2010-08-03	Ag(DSM)1	yes	gambiae	BC2	G3	no	not known	First	First	individual	107	106	1
2010-08-03	Ag(DSM)1	yes	gambiae	BC2	G3	no	not known	First	First	individual	106	85	21
2010-08-16	G3	no	gambiae	no data	Ag(DSM)2	yes	BC2	First	First	individual	44	0	44
2010-08-16	G3	no	gambiae	no data	Ag(DSM)2	yes	BC2	First	First	individual	67	0	67
2010-08-16	G3	no	gambiae	no data	Ag(DSM)2	no	BC2	First	First	individual	155	43	112
2010-08-16	G3	no	gambiae	no data	Ag(DSM)2	yes	BC2	First	First	individual	80	0	80
2010-08-16	G3	no	gambiae	no data	Ag(DSM)2	yes	BC2	First	First	individual	74	0	74
2010-08-16	G3	no	gambiae	no data	Ag(DSM)2	yes	BC2	First	First	individual	64	0	64
2010-08-16	G3	no	gambiae	no data	Ag(DSM)2	no	BC2	First	First	individual	83	45	38
2010-08-16	G3	no	gambiae	no data	Ag(DSM)2	yes	BC2	First	First	individual	40	0	40
2010-08-16	G3	no	gambiae	no data	Ag(DSM)2	no	BC2	First	First	individual	32	8	24
2010-08-16	G3	no	gambiae	no data	Ag(DSM)2	yes	BC2	First	First	individual	69	0	69
2010-08-16	G3	no	gambiae	no data	Ag(DSM)2	no	BC2	First	First	individual	50	32	18
2010-08-16	G3	no	gambiae	no data	Ag(DSM)2	yes	BC2	First	First	individual	88	0	88
2010-08-16	G3	no	gambiae	no data	Ag(DSM)2	yes	BC2	First	First	individual	63	0	63
2010-08-16	G3	no	gambiae	no data	Ag(DSM)2	yes	BC2	First	First	individual	110	0	110
2010-08-16	G3	no	gambiae	no data	Ag(DSM)2	yes	BC2	First	First	individual	97	0	97
2010-08-16	G3	no	gambiae	no data	Ag(DSM)2	yes	BC2	First	First	individual	86	0	86
2010-08-16	G3	no	gambiae	no data	Ag(DSM)2	yes	BC2	First	First	individual	89	0	89
2010-08-16	G3	no	gambiae	no data	Ag(DSM)2	no	BC2	First	First	individual	77	72	5
2010-08-16	G3	no	gambiae	no data	Ag(DSM)2	yes	BC2	First	First	individual	98	0	98
2010-08-16	G3	no	gambiae	no data	Ag(DSM)1	yes	BC2	First	First	individual	62	0	62
2010-08-16	G3	no	gambiae	no data	Ag(DSM)1	no	BC2	First	First	individual	65	52	13
2010-08-16	G3	no	gambiae	no data	Ag(DSM)1	no	BC2	First	First	individual	88	76	12
2010-08-16	G3	no	gambiae	no data	Ag(DSM)1	yes	BC2	First	First	individual	49	0	49
2010-08-16	G3	no	gambiae	no data	Ag(DSM)1	no	BC2	First	First	individual	92	59	33
2010-08-16	G3	no	gambiae	no data	Ag(DSM)1	no	BC2	First	First	individual	104	95	9
2010-08-16	G3	no	gambiae	no data	Ag(DSM)1	yes	BC2	First	First	individual	55	0	55
2010-08-16	G3	no	gambiae	no data	Ag(DSM)1	no	BC2	First	First	individual	41	16	25
2010-08-16	G3	no	gambiae	no data	Ag(DSM)1	no	BC2	First	First	individual	70	62	8
2010-08-16	G3	no	gambiae	no data	Ag(DSM)1	yes	BC2	First	First	individual	25	0	25
2010-08-16	G3	no	gambiae	no data	Ag(DSM)1	no	BC2	First	First	individual	60	25	35
2010-08-16	G3	no	gambiae	no data	Ag(DSM)1	yes	BC2	First	First	individual	41	0	41
2010-08-16	G3	no	gambiae	no data	Ag(DSM)1	yes	BC2	Third	Third	individual	90	0	90
2010-08-16	G3	no	gambiae	no data	Ag(DSM)1	no	BC2	Third	Third	individual	111	83	28
2010-08-16	G3	no	gambiae	no data	Ag(DSM)1	no	BC2	Third	Third	individual	93	79	14
2010-08-16	G3	no	gambiae	no data	Ag(DSM)1	no	BC2	Third	Third	individual	75	62	13
2010-08-16	G3	no	gambiae	no data	Ag(DSM)1	yes	BC2	Third	Third	individual	64	0	64
2010-08-16	G3	no	gambiae	no data	Ag(DSM)1	yes	BC2	Third	Third	individual	85	0	85
2010-08-16	G3	no	gambiae	no data	Ag(DSM)1	no	BC2	Third	Third	individual	50	34	16
2010-08-16	G3	no	gambiae	no data	Ag(DSM)1	no	BC2	Third	Third	individual	81	79	2
2010-08-16	G3	no	gambiae	no data	Ag(DSM)1	yes	BC2	Third	Third	individual	103	0	103
2010-08-16	G3	no	gambiae	no data	Ag(DSM)1	no	BC2	Third	Third	individual	151	148	3
2010-08-16	G3	no	gambiae	no data	Ag(DSM)1	yes	BC2	Third	Third	individual	137	0	137
2010-08-16	G3	no	gambiae	no data	Ag(DSM)1	yes	BC2	Third	Third	individual	73	0	73
2010-08-16	G3	no	gambiae	no data	Ag(DSM)1	no	BC2	Third	Third	individual	122	21	101
2010-08-16	G3	no	gambiae	no data	Ag(DSM)2	yes	BC2	Third	Third	individual	87	0	87
2010-08-16	G3	no	gambiae	no data	Ag(DSM)2	yes	BC2	Third	Third	individual	84	0	84
2010-08-16	G3	no	gambiae	no data	Ag(DSM)2	no	BC2	Third	Third	individual	127	41	86
2010-08-16	G3	no	gambiae	no data	Ag(DSM)2	no	BC2	Third	Third	individual	54	26	28
2010-08-16	G3	no	gambiae	no data	Ag(DSM)2	no	BC2	Third	Third	individual	101	84	17
2010-08-16	G3	no	gambiae	no data	Ag(DSM)2	yes	BC2	Third	Third	individual	104	0	104
2010-08-16	G3	no	gambiae	no data	Ag(DSM)2	yes	BC2	Third	Third	individual	102	0	102
2010-08-16	G3	no	gambiae	no data	Ag(DSM)2	yes	BC2	Third	Third	individual	71	0	71
2010-08-16	G3	no	gambiae	no data	Ag(DSM)2	yes	BC2	Third	Third	individual	92	0	92
2010-08-16	G3	no	gambiae	no data	Ag(DSM)2	yes	BC2	Third	Third	individual	94	0	94
2010-08-16	G3	no	gambiae	no data	Ag(DSM)2	yes	BC2	Third	Third	individual	104	0	104
2010-08-16	G3	no	gambiae	no data	Ag(DSM)2	no	BC2	Third	Third	individual	105	53	52
2010-08-16	G3	no	gambiae	no data	Ag(DSM)2	yes	BC2	Third	Third	individual	129	0	129
2010-08-16	G3	no	gambiae	no data	Ag(DSM)2	yes	BC2	Third	Third	individual	114	0	114
2010-08-16	G3	no	gambiae	no data	Ag(DSM)2	yes	BC2	Third	Third	individual	85	0	85
2010-08-16	G3	no	gambiae	no data	Ag(DSM)2	yes	BC2	Third	Third	individual	81	0	81
2010-08-01	Ag(DSM)1	yes	gambiae	BC2	G3	no	not known	First	First	individual	166	163	3
2010-08-01	Ag(DSM)2	yes	gambiae	BC2	G3	no	not known	First	First	individual	115	89	26
2010-08-01	Ag(DSM)2	yes	gambiae	BC2	G3	no	not known	First	First	individual	80	68	12
2010-08-01	Ag(DSM)2	yes	gambiae	BC2	G3	no	not known	First	First	individual	54	48	6
2010-08-01	Ag(DSM)2	yes	gambiae	BC2	G3	no	not known	First	First	individual	136	123	13
